# Supplementary material for: Health Care Costs, Utilization and Patterns of Care following Lyme Disease
Source: PubMed Central journal article supplement (PMC4317177; doi:10.1371/journal.pone.0116767), 2015-02-04
Supplement: pone.0116767.s001.pdf [file pone.0116767.s001.pdf]

**Figure S1. Distribution of Lyme disease sample by month of diagnosis\***

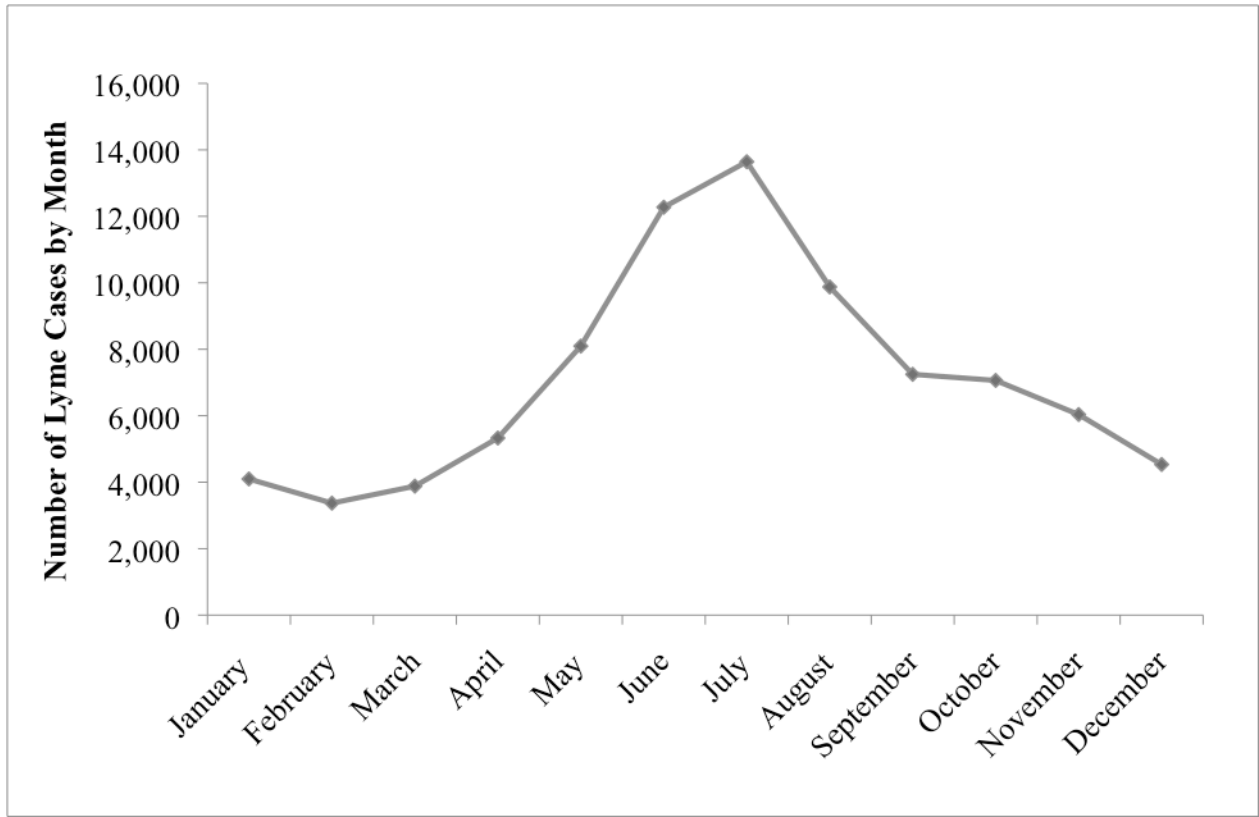

\*“Month of diagnosis” defined as the month in which an individual’s claims indicated they received a Lyme disease test order and antibiotic treatment, a Lyme disease diagnosis and antibiotic treatment, or a Lyme disease diagnosis, test order and antibiotic treatment.
