# Supplementary material for: Health Care Costs, Utilization and Patterns of Care following Lyme Disease
Source: PubMed Central journal article supplement (PMC4317177; doi:10.1371/journal.pone.0116767), 2015-02-04
Supplement: pone.0116767.s002.pdf [file pone.0116767.s002.pdf]

**Table S1. Regions and States**

| <b>Northeast</b>   | <b>Mid-Atlantic</b> | <b>Great Lakes</b> | <b>Pacific</b> | <b>Southeast</b> |
|--------------------|---------------------|--------------------|----------------|------------------|
| Maine              | Pennsylvania        | Minnesota          | Washington     | N. Carolina      |
| Vermont            | New Jersey          | Michigan           | Oregon         | S. Carolina      |
| New Hampshire      | Delaware            | Wisconsin          | California     | Georgia          |
| Connecticut        | Maryland            | Illinois           | Alaska         | Florida          |
| Massachusetts      | Virginia            | Iowa               | Hawaii         | Alabama          |
| Rhode Island       | D.C.                | Indiana            |                |                  |
| New York           |                     |                    |                |                  |
| <b>Appalachian</b> | <b>Central</b>      | <b>Plains/Mt.</b>  | <b>Desert</b>  |                  |
| Ohio               | Missouri            | N. Dakota          | Arizona        |                  |
| W. Virginia        | Arkansas            | S. Dakota          | New Mexico     |                  |
| Tennessee          | Texas               | Wyoming            | Utah           |                  |
| Kentucky           | Oklahoma            | Nebraska           | Colorado       |                  |
| Mississippi        | Louisiana           | Kansas             | Nevada         |                  |
|                    |                     | Idaho              |                |                  |
|                    |                     | Montana            |                |                  |
