# Supplementary material for: Health Care Costs, Utilization and Patterns of Care following Lyme Disease
Source: PubMed Central journal article supplement (PMC4317177; doi:10.1371/journal.pone.0116767), 2015-02-04
Supplement: pone.0116767.s006.pdf [file pone.0116767.s006.pdf]

**Table S5. Post-treatment Lyme disease-related condition presence by time of diagnosis (pre-Lyme disease and/or post-Lyme disease period), Lyme disease group\***

| <b>Condition/EDC Category<sup>†</sup></b> | <b>Person Counts by Condition Presence in Pre and/or Post Lyme Period</b> |                                             |                                                 |                                              |
|-------------------------------------------|---------------------------------------------------------------------------|---------------------------------------------|-------------------------------------------------|----------------------------------------------|
|                                           | <b>Count of selected ICD Codes</b>                                        | <b>Persons with Condition Pre Lyme Only</b> | <b>Persons with Condition Pre and Post Lyme</b> | <b>Persons with Condition Post Lyme Only</b> |
| <b>Arthropathy</b>                        | 82                                                                        | 1,087                                       | 273                                             | 2,336                                        |
| <b>Debility and undue fatigue</b>         | 3                                                                         | 3,918                                       | 1,192                                           | 6,612                                        |
| <b>Musculoskeletal signs and symptoms</b> | 41                                                                        | 5,198                                       | 1,826                                           | 8,753                                        |
| <b>Nonspecific signs and symptoms</b>     | 8                                                                         | 588                                         | 127                                             | 1,300                                        |
| <b>Peripheral neuropathy, neuritis</b>    | 72                                                                        | 1,685                                       | 669                                             | 3,301                                        |

\* Lyme disease sample includes only those persons with a test order and antibiotic treatment within 30 days of the test order, a diagnosis and antibiotic treatment within 30 days of the diagnosis, or a diagnosis, test order and antibiotic treatment within 30 days. The Lyme disease sample includes only those with 18 consecutive months of enrollment, including a 6-month “clean period” of enrollment prior to Lyme disease episode in which they were neither diagnosed with nor tested for Lyme disease.

<sup>†</sup> A person may have claims in multiple EDC categories.
