# Supplementary material for: Health Care Costs, Utilization and Patterns of Care following Lyme Disease
Source: PubMed Central journal article supplement (PMC4317177; doi:10.1371/journal.pone.0116767), 2015-02-04
Supplement: pone.0116767.s007.pdf [file pone.0116767.s007.pdf]

**Table S6. Post-treatment Lyme disease symptom-related diagnoses among Lyme disease and control groups, using diagnoses recorded post-Lyme disease episode only for Lyme disease group**

|                                                                         | (I)<br>Frequency of<br>PTLDS-<br>related<br>diagnoses,<br>Lyme disease<br>group <sup>*</sup> | (II)<br>Frequency of<br>PTLDS-<br>related<br>diagnoses,<br>control<br>group <sup>†</sup> | (III)<br>$\chi^2$ test (of<br>difference in<br>frequencies) | (IV)<br>Adjusted odds of<br>PTLDS-related<br>diagnoses for<br>Lyme disease<br>group versus<br>control group,<br>(SE) <sup>‡</sup> |
|-------------------------------------------------------------------------|----------------------------------------------------------------------------------------------|------------------------------------------------------------------------------------------|-------------------------------------------------------------|-----------------------------------------------------------------------------------------------------------------------------------|
| <b>Any PTLDS-related diagnosis</b>                                      | 34.4%                                                                                        | 27.6%                                                                                    | p<.001                                                      | 1.36 (0.01)***                                                                                                                    |
| <b>Any PTLDS-related diagnosis, females</b>                             | 37.8%                                                                                        | 30.1 %                                                                                   | p<.001                                                      | 1.39 (0.02)***                                                                                                                    |
| <b>Any PTLDS-related diagnosis, males</b>                               | 30.9%                                                                                        | 24.9%                                                                                    | p<.001                                                      | 1.33 (0.02)***                                                                                                                    |
| <b>Debility and undue fatigue</b>                                       | 13.6%                                                                                        | 8.4 %                                                                                    | p<.001                                                      | 1.69 (0.03)***                                                                                                                    |
| <b>Non-specific signs and symptoms: memory loss, acute/chronic pain</b> | 2.4%                                                                                         | 1.2 %                                                                                    | p<.001                                                      | 1.91 (0.07)***                                                                                                                    |
| <b>Musculoskeletal signs and symptoms</b>                               | 18.4%                                                                                        | 18.9 %                                                                                   | P=.003                                                      | 0.94 (0.01)***                                                                                                                    |
| <b>Arthropathy</b>                                                      | 4.4%                                                                                         | 1.8 %                                                                                    | p<.001                                                      | 2.44 (0.06)***                                                                                                                    |
| <b>Peripheral neuropathy, neuritis</b>                                  | 6.8%                                                                                         | 4.6 %                                                                                    | p<.001                                                      | 1.48 (0.03)***                                                                                                                    |

\*\*\* statistically significant at p<.001 level

<sup>\*</sup> Lyme disease sample includes only those persons with a test order and antibiotic treatment, diagnosis and antibiotic treatment, or diagnosis, test order and antibiotic treatment. Lyme disease sample includes only those with 18 consecutive months of enrollment, including 6-month “clean period” of enrollment prior to Lyme disease episode. Lyme disease group PTLDS calculations only include those PTLDS-related diagnoses that were made following a Lyme disease episode, i.e. among the Lyme disease group, PTLDS-related diagnoses made prior to the Lyme disease episode were excluded from the PTLDS analysis.

<sup>†</sup> Controls were matched to Lyme disease cases on age, sex, region, payer and enrollment year. Control group includes only those with 18 consecutive months of enrollment in a commercial health insurance plan. Control group was restricted to persons with outpatient costs greater than \$0.

Lyme disease and control samples are restricted to persons under 65 years of age, with commercial health insurance plans.

<sup>‡</sup> Odds are calculated using logistic regression analysis and are adjusted for year, region, age, and sex, and controls for 44 high-cost conditions.
