# Supplementary material for: Health Care Costs, Utilization and Patterns of Care following Lyme Disease
Source: PLoS One. 2015 Feb 4;10(2):e0116767. doi: 10.1371/journal.pone.0116767 (PMC4317177; doi:10.1371/journal.pone.0116767)
Supplement: S3 Table — (PDF) [file pone.0116767.s004.pdf]

**Table S3. Type of antibiotic prescribed, Lyme disease sample\***

| <b>Antibiotic</b>       | <b>No. (%)<sup>†</sup></b> |
|-------------------------|----------------------------|
| Missing                 | 62 (0.12)                  |
| Amoxicillin             | 10,115 (19.16)             |
| Amoxicillin-clavulanate | 4,533 (8.59)               |
| Cefotaxime              | 67 (0.13)                  |
| Ceftriaxone             | 2,658 (5.03)               |
| Cefuroxime              | 2,241 (4.24)               |
| Doxycycline             | 31,705 (60.05)             |
| Erythromycin            | 316 (0.6)                  |
| Penicillin              | 771 (1.46)                 |
| Tetracycline            | 327 (0.62)                 |

\* Lyme disease sample includes only those persons with a test order and antibiotic treatment within 30 days of the test order, a diagnosis and antibiotic treatment within 30 days of the diagnosis, or a diagnosis, test order and antibiotic treatment within 30 days. The Lyme disease sample includes only those with 18 consecutive months of enrollment, including a 6-month “clean period” of enrollment prior to Lyme disease episode in which they were neither diagnosed with nor tested for Lyme disease.

<sup>†</sup> Out of total 52,795 cases included in Lyme disease sample.
